# Supplementary material for: Caliciviral protein-based artificial translational activator for mammalian gene circuits with RNA-only delivery
Source: PubMed Central journal article supplement (PMC7064597; doi:10.1038/s41467-020-15061-x), 2020-03-10
Supplement: 41467_2020_15061_MOESM4_ESM.pdf [file 41467_2020_15061_MOESM4_ESM.pdf]

**Title:** Supplementary Video 1

**Description:** Fluorescent time-lapse imaging of cells transfected with MS2CP-1xDmrA and DmrC-VPg(FCV) (A/C heterodimerizer concentration: 500 nM).

**Title:** Supplementary Video 2

**Description:** Fluorescent time-lapse imaging of cells transfected with MS2CP-1xDmrA and DmrC-VPg(FCV) (A/C heterodimerizer concentration: 0 nM).
